# Supplementary material
Source: publisher figshare collection journal article supplement (https://karger.figshare.com/ndownloader/files/18055697)
Supplement: Supplementary file 1 [file 18055697]

**Supplementary Table 1.** Demographic data and perioperative characteristics of patients

| **Variable** | **Control Group**  **(n = 32)** | **Flurbiprofen Group**  **(n = 32)** | **Difference**  **(95% CI)** | ***p* value** |
| --- | --- | --- | --- | --- |
| Age, years | 56 (5) | 54 (6) | 2 (-4 to 8) | 0.455 |
| BMI, kg/m2 | 23.9 (4.9) | 24.3 (4.1) | -0.4 (-5.3 to 4.5) | 0.857 |
| Female Sex (n patients) | 13 | 9 | NA | 0.292 |
| ASA Status (n patients) |  |  | NA | 0.672 |
| I | 4 | 2 |  |  |
| II | 28 | 30 |  |  |
| Type of surgery (n patients) |  |  | NA | 0.320 |
| Lobectomy plus lymphadenectomy | 25 | 28 |  |  |
| Segmentectomy plus lymphadenectomy | 7 | 4 |  |  |
| Duration of surgery, min | 134 (9) | 143 (11) | -8(-19 to 2) | 0.114 |
| Total propofol, mg | 838 (134) | 893 (138) | -55 (-201 to 91) | 0.434 |
| Total remifentanyl, µg | 1045 (106) | 888 (131) | 157 (29-284) | 0.019 |
| Nausea (24 hours postoperative) (n patients) | 12 | 6 | NA | 0.095 |
| Vomiting and dry retching (24 hours postoperative) (n patients) | 8 | 1 | NA | 0.026 |
| Respiratory depression (n patients) | 1 | 0 | NA | 1.0 |
| Use of anti-emetics (n patients) | 13 | 4 | NA | 0.011 |
| Skin pruritus (n patients) | 1 | 0 | NA | 1.0 |
| Length of hospital stay, days | 7.5 (0.9) | 7.3 (0.7) | 0.3 (-0.6 to 1.1) | 0.554 |
| Tramadol rescue analgesia (n patients) | 10 | 3 | NA | 0.030 |
| VAS pain score, 0–10 |  |  |  |  |
| 24-hour postoperative score at rest | 3 (2–4) | 2 (1–3) | NA | 0.123 |
| 24-hour postoperative score with cough | 6 (2–7) | 2 (1–4) | NA | 0.009 |
| 72-hour postoperative score at rest | 2 (0–3) | 1 (0–2) | NA | 0.315 |
| 72-hour postoperative score with cough | 2 (1–4) | 1 (0–2) | NA | 0.105 |
| Use of intraoperative antibiotics (n patients) |  |  | NA | 1.0 |
| Cefuroxime | 32 | 31 |  |  |
| Levofloxacin | 0 | 1 |  |  |
| Use of antibiotics 24 hours postoperatively, Cefuroxime (n patients) | 5 | 2 | NA | 0.426 |
| Use of antibiotics 24 hours postoperatively, Levofloxacin (n patients) | 0 | 0 | NA | 1.0 |
| Use of antibiotics 72 hours postoperatively, Cefuroxime (n patients) | 3 | 2 | NA | 1.0 |
| Use of antibiotics 72 hours postoperatively, Levofloxacin (n patients) | 0 | 0 | NA | 1.0 |
| 24-hour postoperative wound infection (n patients) | 3 | 0 | NA | 0.238 |
| 72-hour postoperative wound infection (n patients) | 1 | 1 | NA | 1.0 |

All continuous data are presented as mean (SD) or median (interquartile range, IQR) and compared using an independent Student’s t-test or Mann-Whitney U test, respectively. Categorical data are presented as frequency and analyzed using a chi-square or Fisher’s exact test. BMI = body mass index; ASA = American Society of Anesthesiologists; VAS = visual analogue scale; NA = not applicable.
